# Supplementary material for: A chromatin structure‐based model accurately predicts DNA replication timing in human cells
Source: PubMed Central journal article supplement (PMC4017678; doi:10.1002/msb.134859), 2014-03-28
Supplement: MSB-10-3-722-s03.pdf [file MSB-10-3-722-s03.pdf]

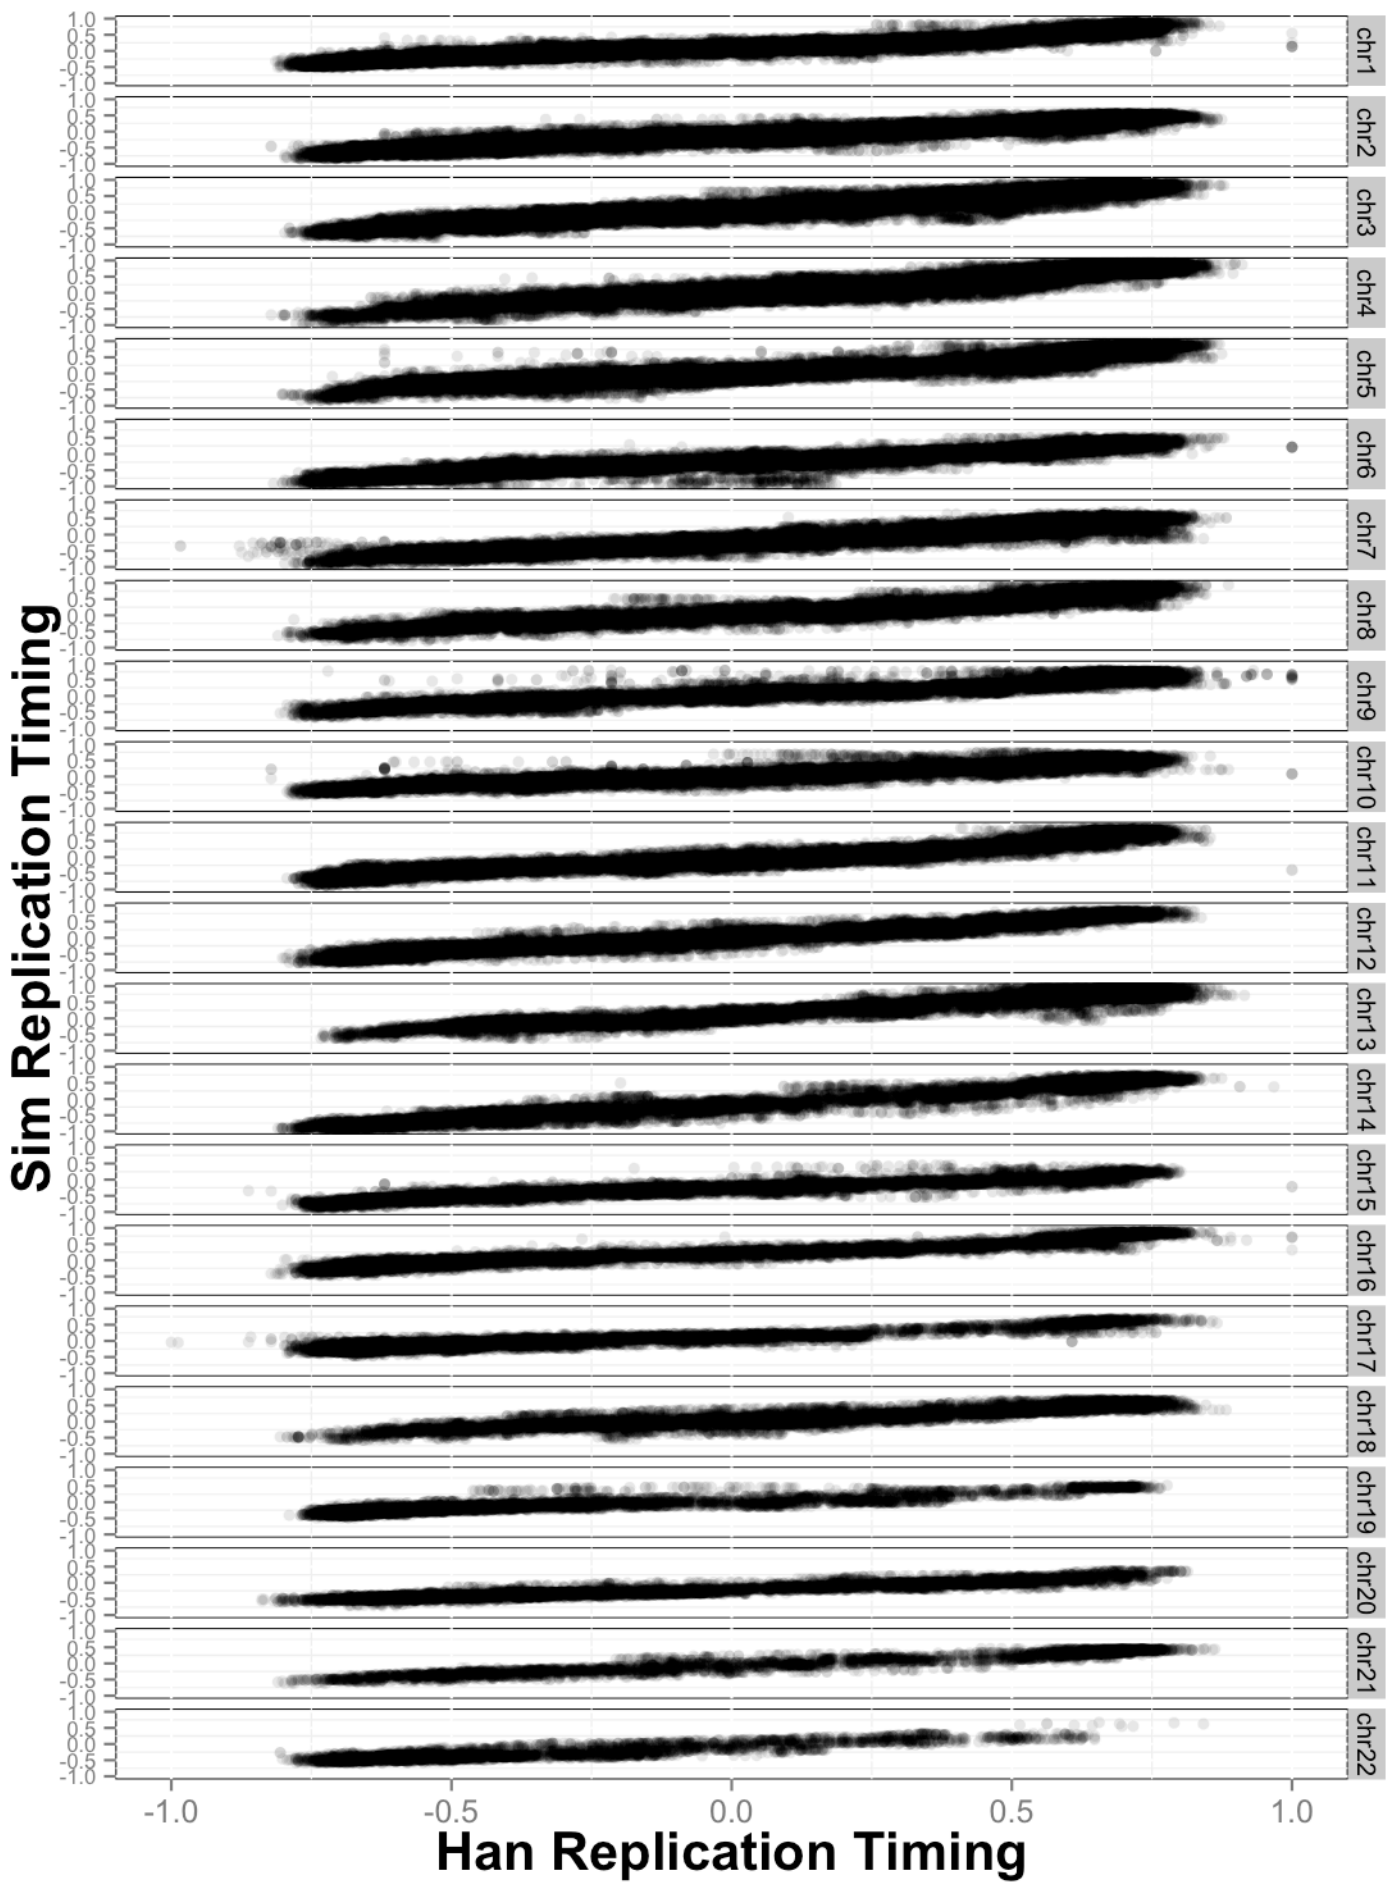

**Figure S2**

**Simulated and empirical DNA replication timing are highly correlated.**

Each point represents a replication time assignment for a 500 nt bin for 22 autosomal chromosomes of GM06990 cells. Simulated replication timing assignment is given on the y-axis and the experimentally derived assignment is given on the x-axis. Contour overlay is meant to aid in interpreting plot density.
