# Supplementary material for: A chromatin structure‐based model accurately predicts DNA replication timing in human cells
Source: PubMed Central journal article supplement (PMC4017678; doi:10.1002/msb.134859), 2014-03-28
Supplement: MSB-10-3-722-s05.pdf [file MSB-10-3-722-s05.pdf]

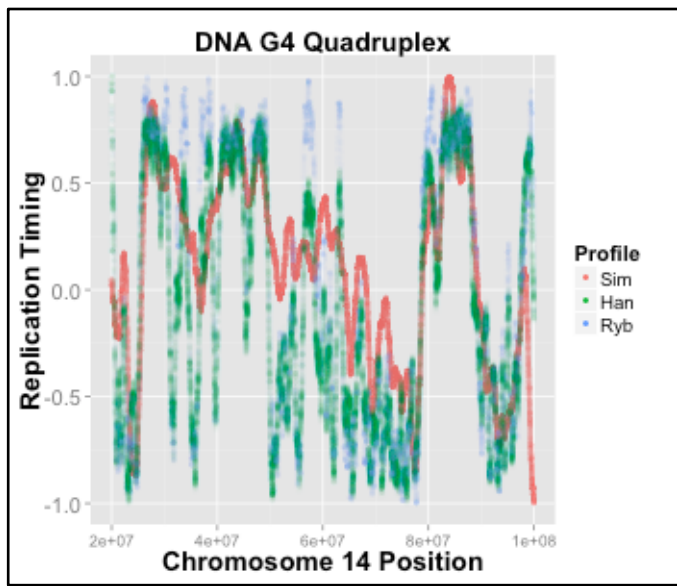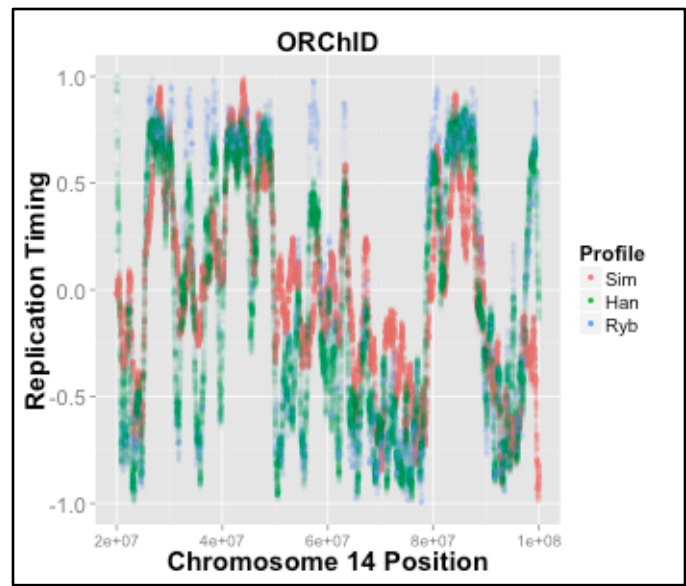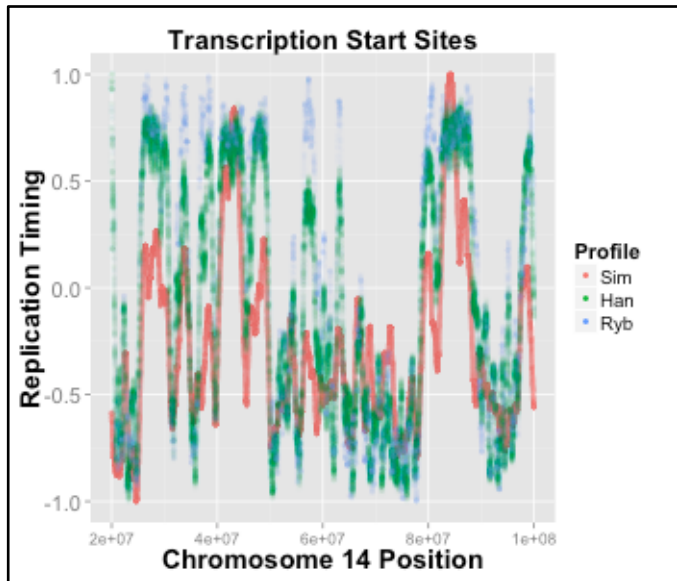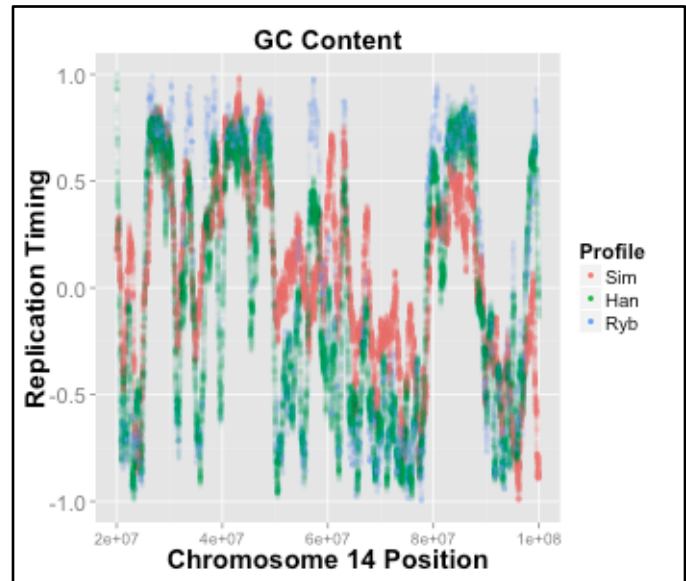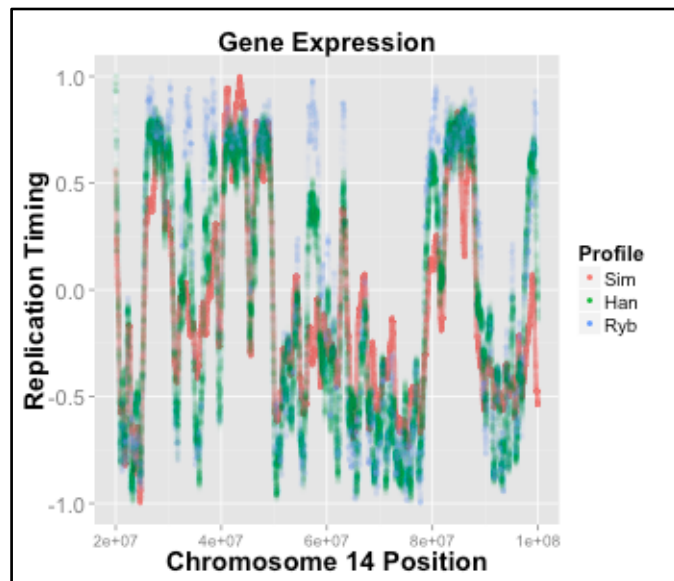

**Figure S3**

**Experimental and simulated timing on chromosome 14 in GM06990 for sequence features and gene expression.** Simulations based on genome sequence features (GC content, CpG islands), on local genome conformation (ORChID, G-quadruplex), and on organism-wide transcription start sites generate timing patterns that correlate well with replication timing in five cell lines. Simulated profiles (red) are plotted on the same axes as two empirical datasets: the Hansen (Han) dataset (red) and the Ryba (Ryb) dataset (blue).
