# Supplementary material for: A chromatin structure‐based model accurately predicts DNA replication timing in human cells
Source: PubMed Central journal article supplement (PMC4017678; doi:10.1002/msb.134859), 2014-03-28
Supplement: MSB-10-3-722-s09.pdf [file MSB-10-3-722-s09.pdf]

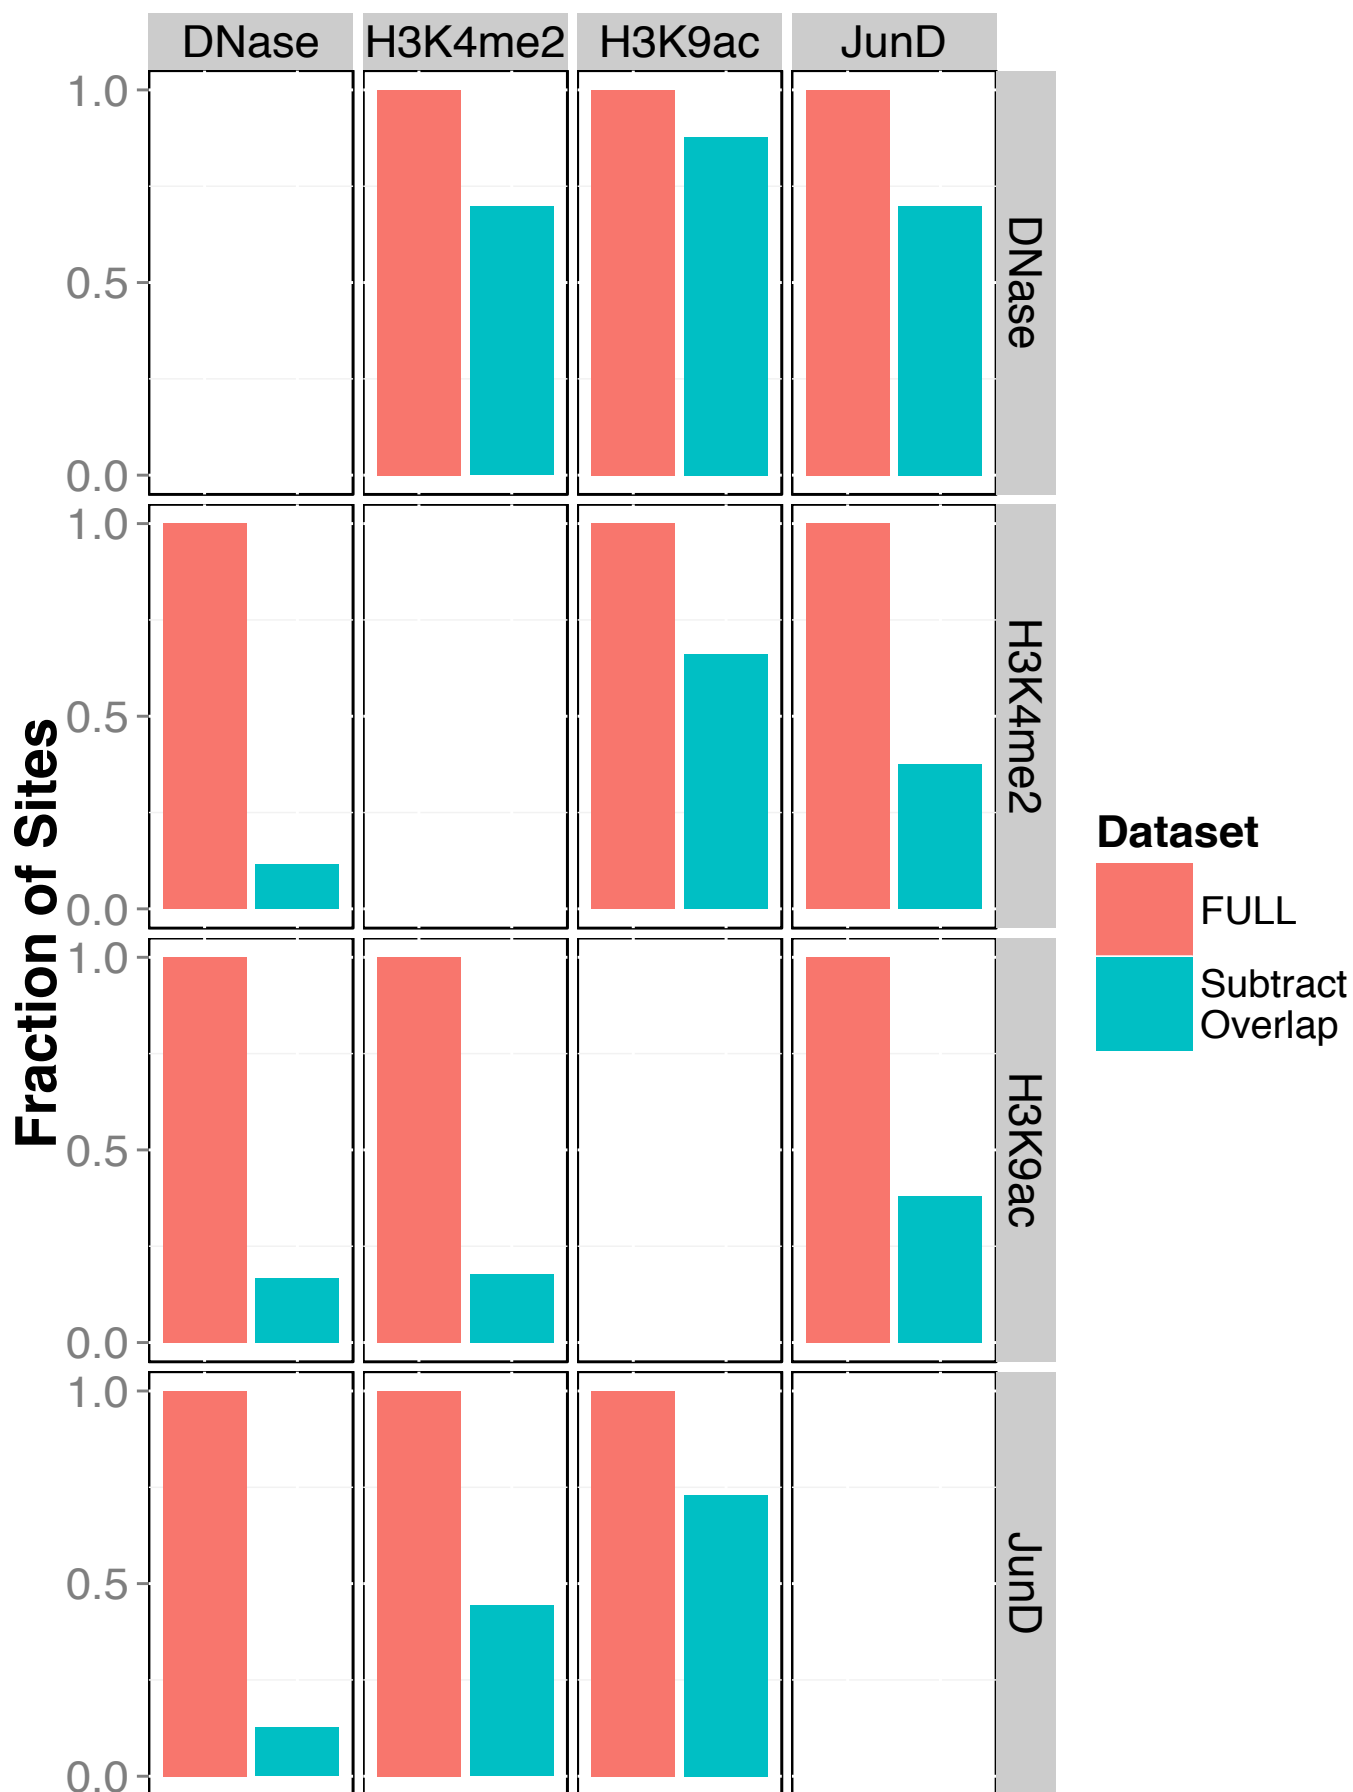

## Figure S5

The extent of genome localization overlap between top DNA replication timing-predicting genomic marks.

Using the datasets presented in Figure 2b, rows indicate the dataset and columns indicate the effect of subtracting a dataset. Each vertical bar represents the fraction of genomic regions in the dataset: original dataset (red) and reduced dataset (blue).
