# Supplementary material for: A chromatin structure‐based model accurately predicts DNA replication timing in human cells
Source: PubMed Central journal article supplement (PMC4017678; doi:10.1002/msb.134859), 2014-03-28
Supplement: MSB-10-3-722-s15.pdf [file MSB-10-3-722-s15.pdf]

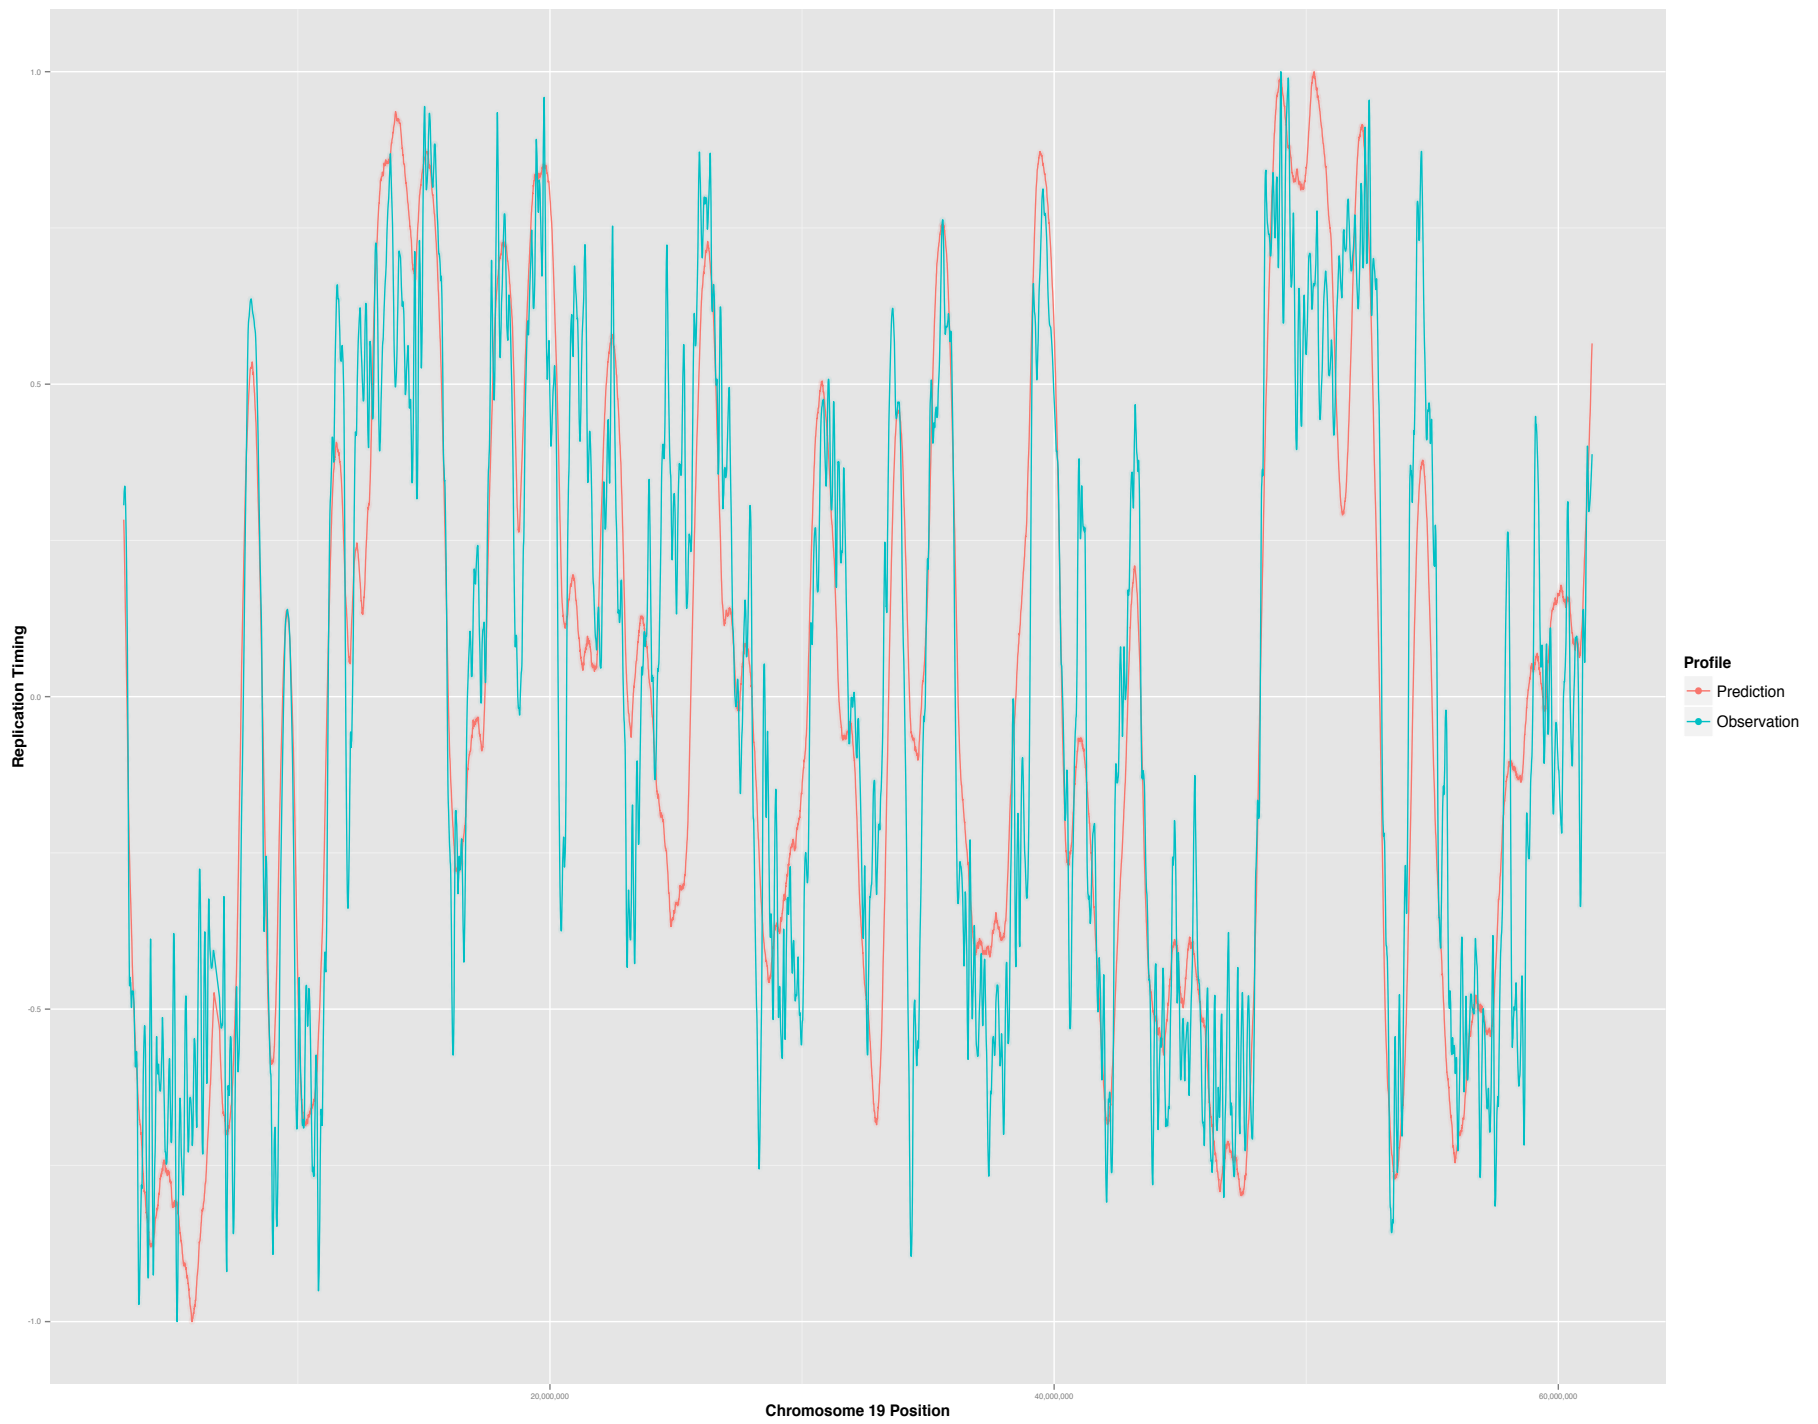

## Figure S8

**DNA replication timing predictions applied to mouse cells.** Plotted are simulated (red) and observed (blue) DNA replication timing (y-axis) profiles for chromosome 19 (x-axis) of mouse embryonic fibroblast cells. Simulated profile is based on DNase HS data for NIH/3T3 cells. Observed data is derived from MEF cells.
