# Supplementary material for: A chromatin structure‐based model accurately predicts DNA replication timing in human cells
Source: PubMed Central journal article supplement (PMC4017678; doi:10.1002/msb.134859), 2014-03-28
Supplement: MSB-10-3-722-s23.pdf [file MSB-10-3-722-s23.pdf]

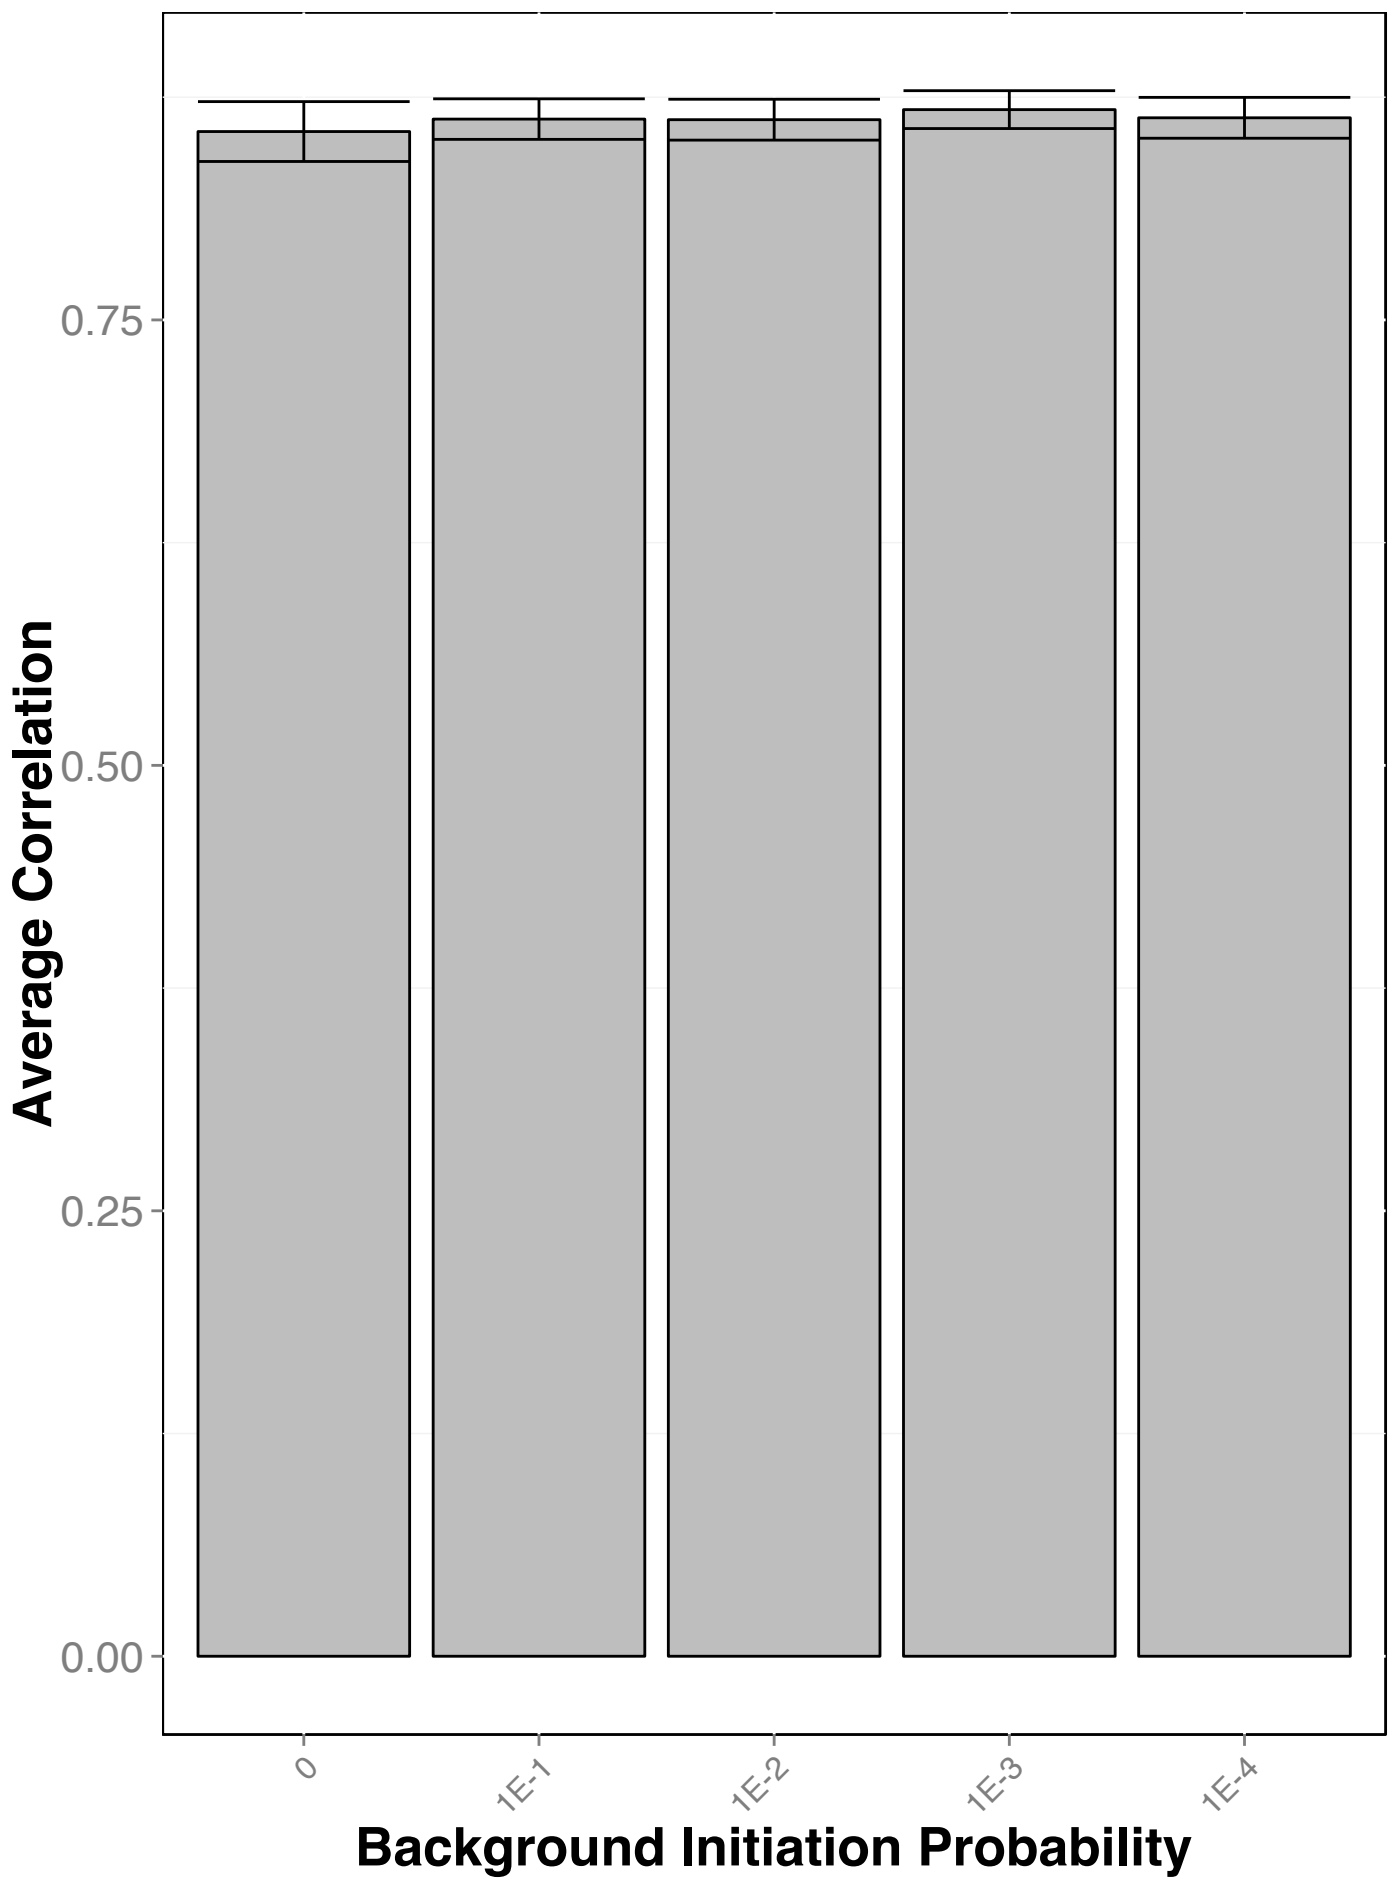

## Figure S12

**Background initiation probability does not affect the accuracy of model's predictions.** DNA replication timing was predicted using DNase HS IPLS model as input for a range of background initiation probabilities (x-axis). In each case the average correlation with empirical data (y-axis) is only marginally affected. Error bars are standard error of the mean arising from averaging correlations across 22 autosomal chromosomes.
