# Supplementary material for: A chromatin structure‐based model accurately predicts DNA replication timing in human cells
Source: PubMed Central journal article supplement (PMC4017678; doi:10.1002/msb.134859), 2014-03-28
Supplement: MSB-10-3-722-s25.pdf [file MSB-10-3-722-s25.pdf]

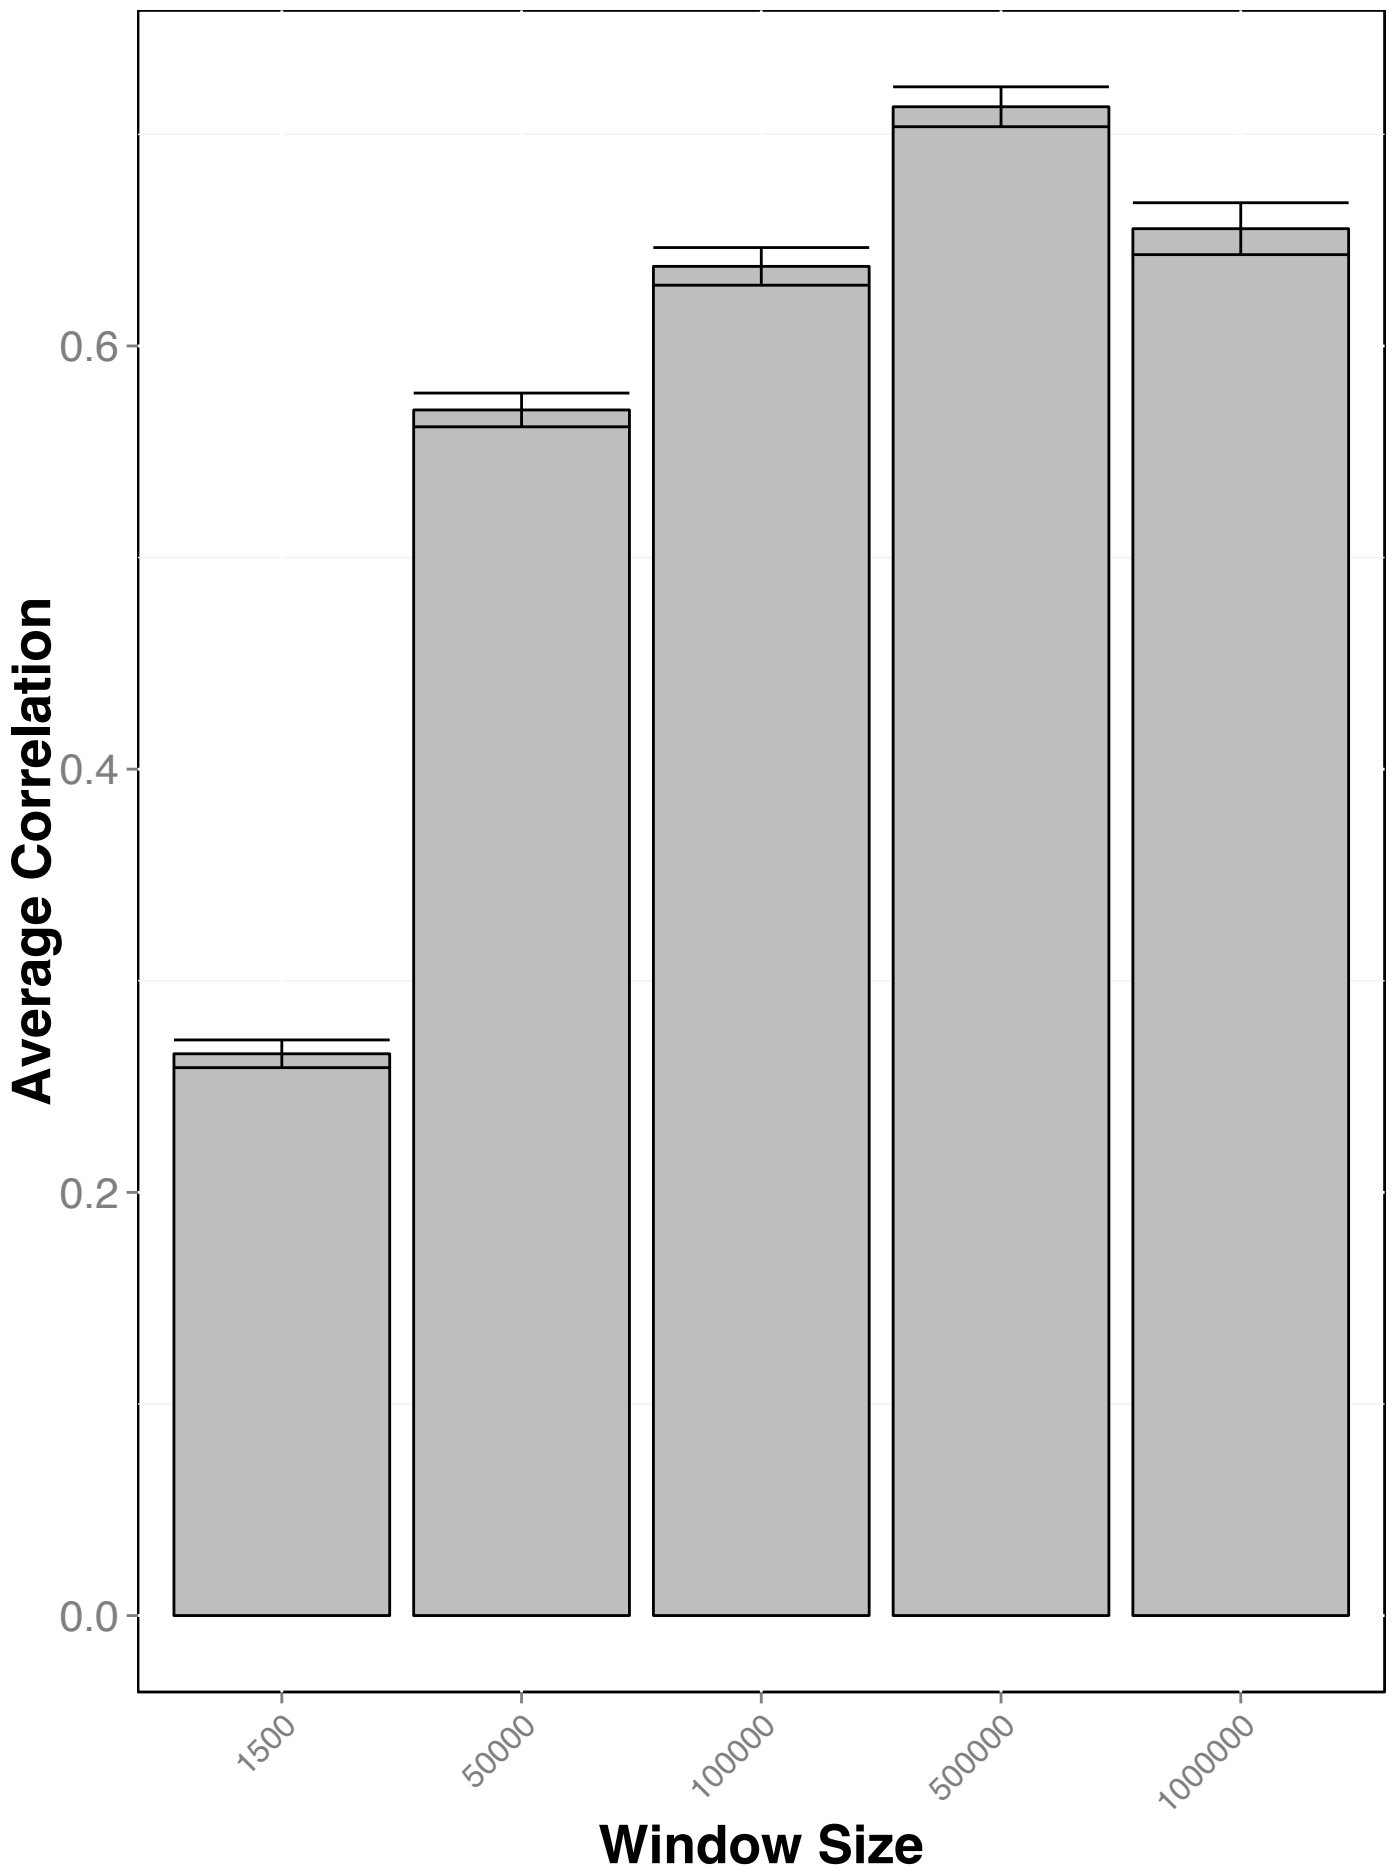

### Figure S13

**DNase HS site density correlates with DNA replication timing.** The number of DNase HS were summed for various sliding genome windows (x-axis) and correlated with empirical DNA replication timing data for same cells (GM06990). The best correlation ( $r=0.71$ ) was obtained using the 0.5MB window. Error bars represent the standard error of the mean resulting from averaging correlation across 22 autosomal chromosomes.
