# Supplementary material for: A chromatin structure‐based model accurately predicts DNA replication timing in human cells
Source: PubMed Central journal article supplement (PMC4017678; doi:10.1002/msb.134859), 2014-03-28
Supplement: MSB-10-3-722-s27.pdf [file MSB-10-3-722-s27.pdf]

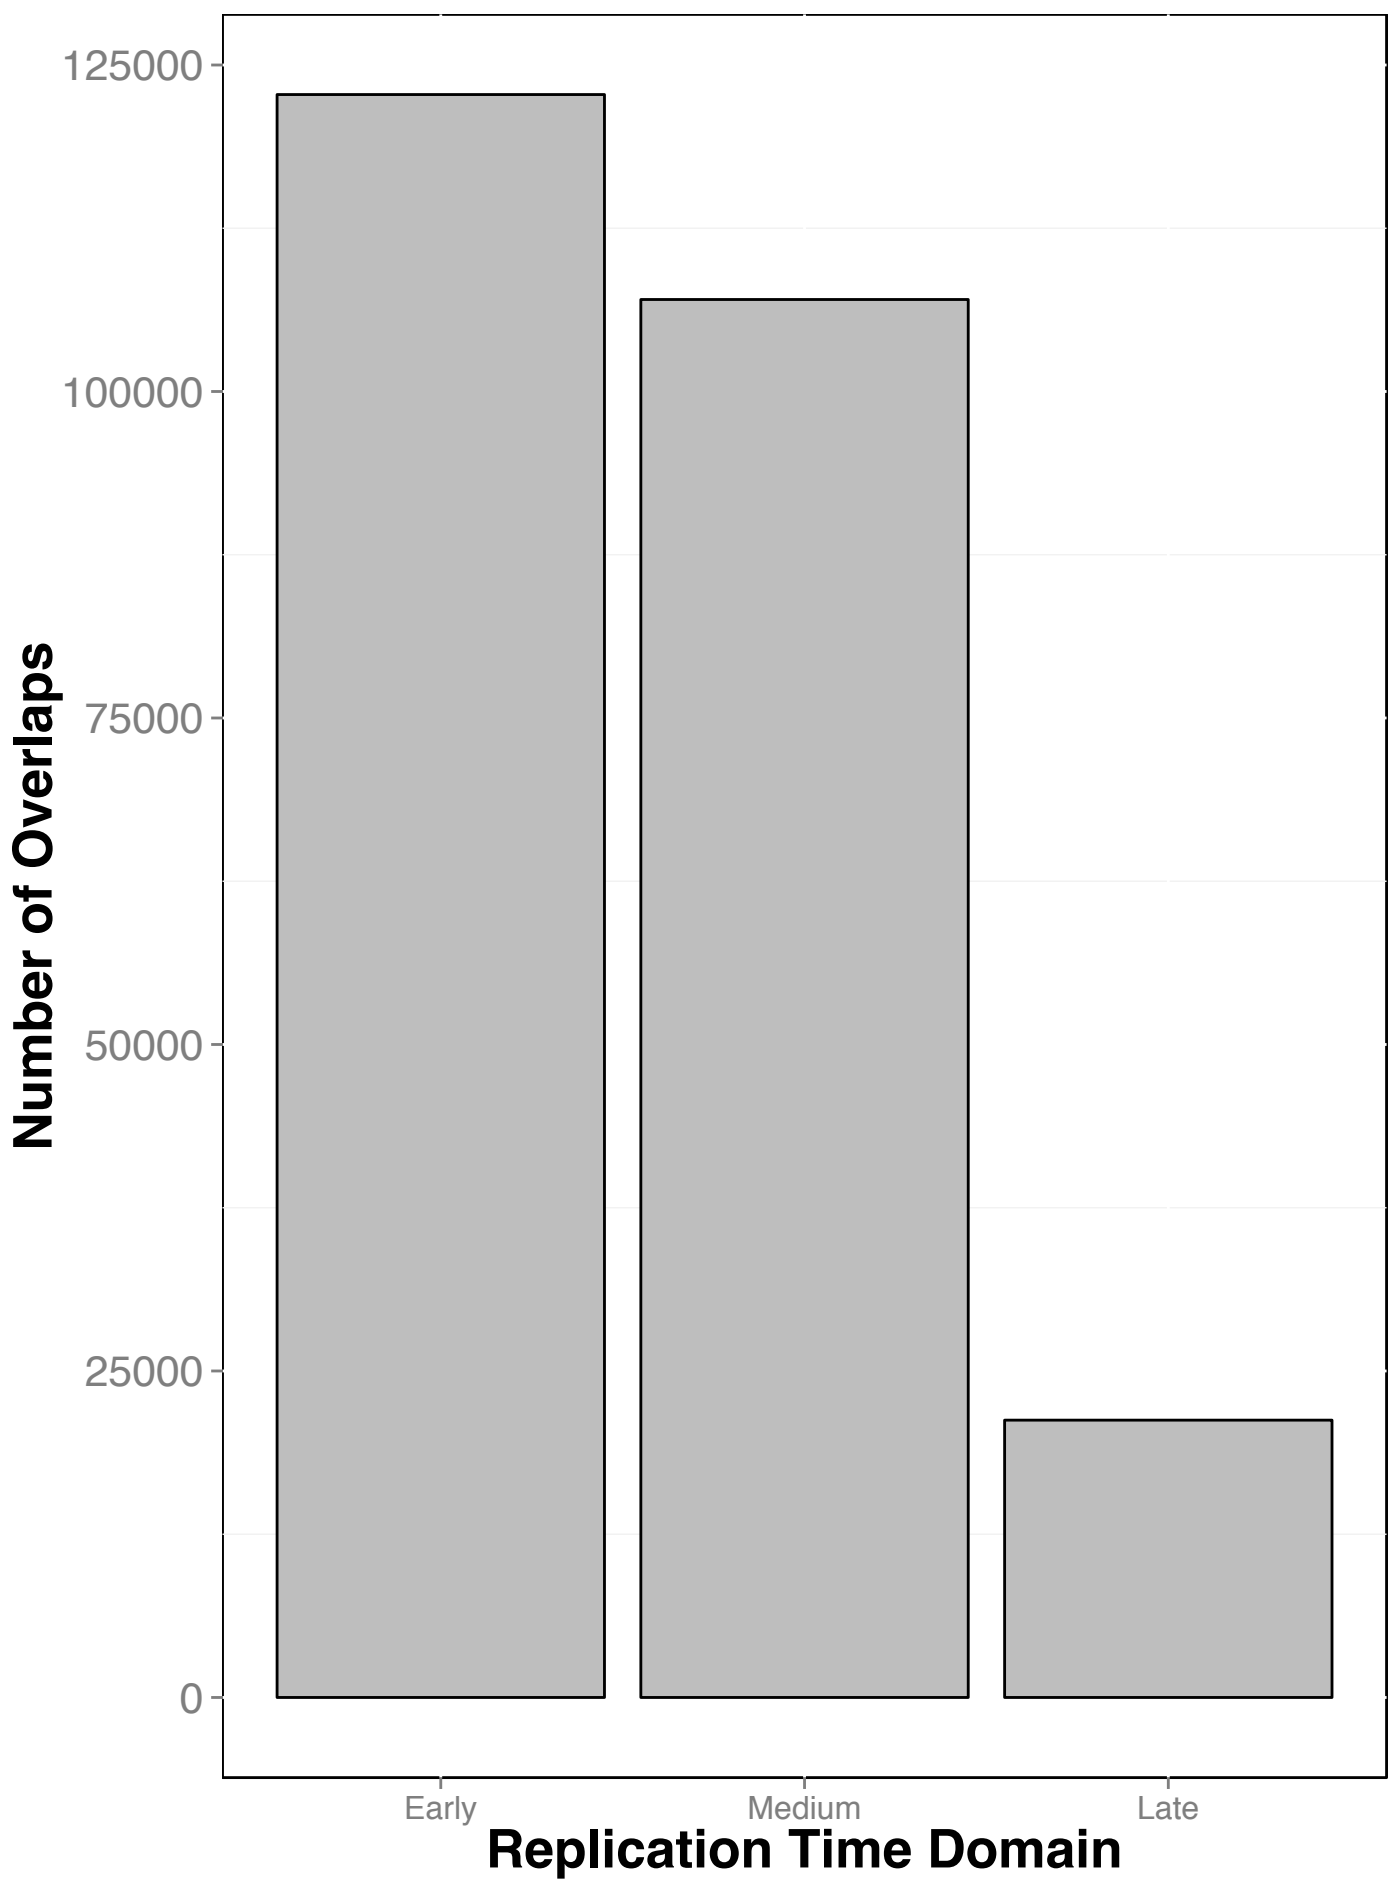

## Figure S14

**Majority of DNase HS sites reside in early or medium replication timing domains.** DNase HS were assigned into one of three DNA replication timing domain bins (x-axis) by consulting empirical data for matching cells (GM06990). The number of DNase sites in each bin were then counted (y-axis).
