# Supplementary material for: A chromatin structure‐based model accurately predicts DNA replication timing in human cells
Source: PubMed Central journal article supplement (PMC4017678; doi:10.1002/msb.134859), 2014-03-28
Supplement: MSB-10-3-722-s29.pdf [file MSB-10-3-722-s29.pdf]

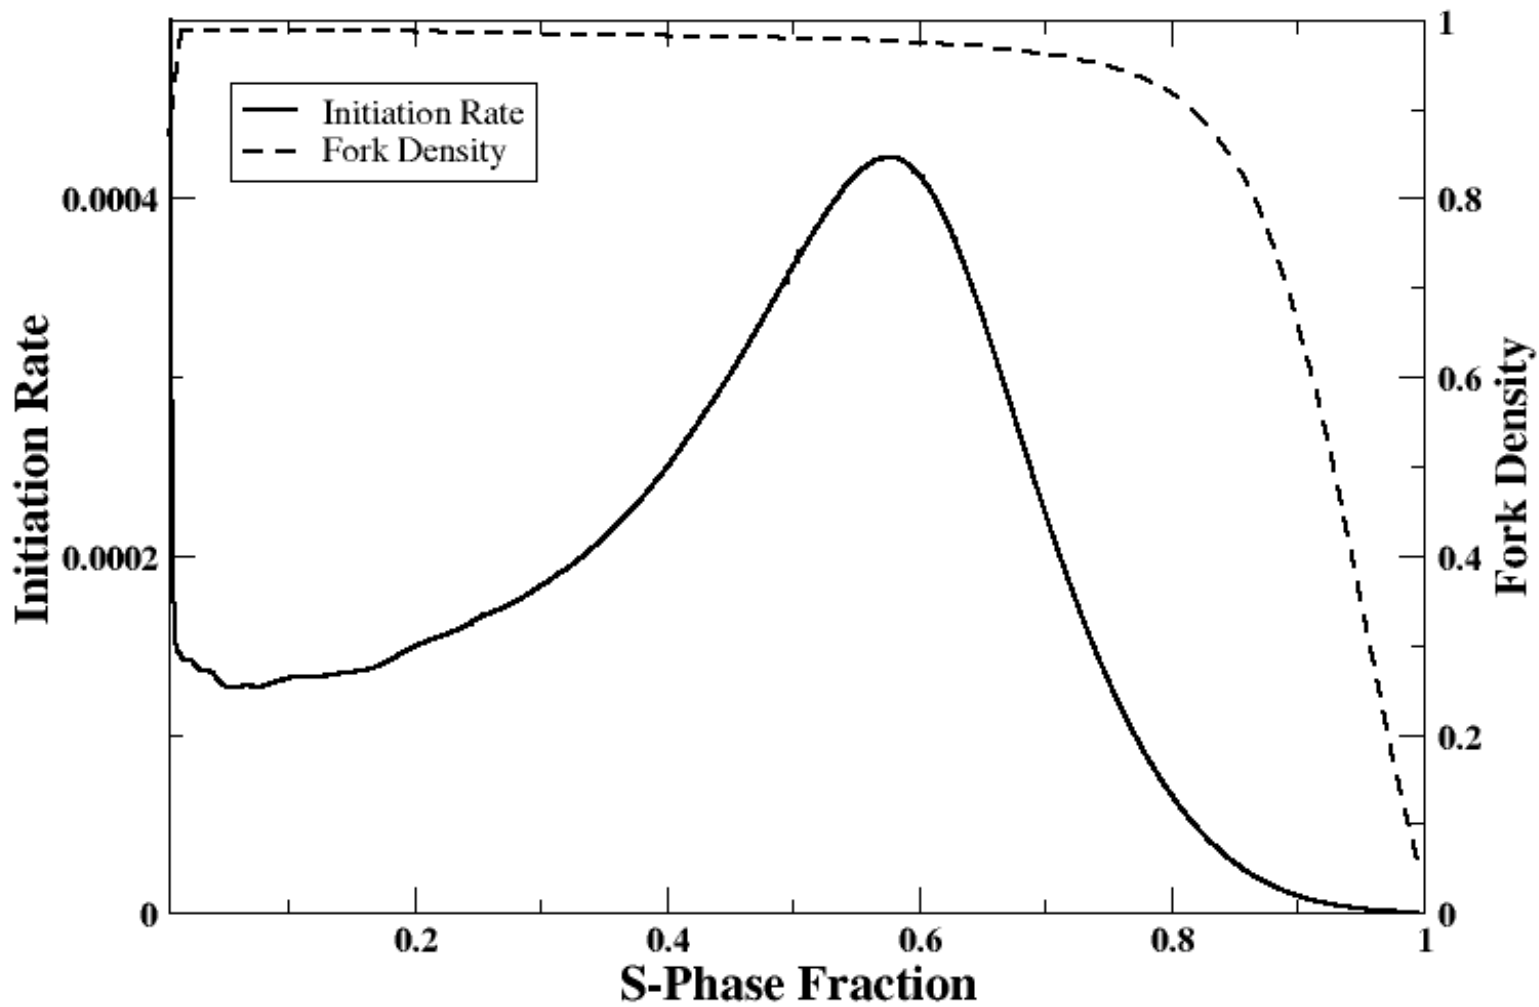

**Figure S15**

**Change in global initiation rate and fork density over S-phase.** The initiation rate (number of initiation events per kilobase) and fork density (fraction of engaged replication forks) were averaged for simulated cell population and plotted as a function of S-phase fraction (time along the S-phase).
